# Supplementary material for: Digital technology for orthognathic surgery training promotion: a randomized comparative study
Source: PeerJ. 2022 Aug 2;10:e13810. doi: 10.7717/peerj.13810 (PMC9354792; doi:10.7717/peerj.13810)
Supplement: Supplemental Information 1 [file peerj-10-13810-s001.xlsx]

## Sheet: Sheet1
subjective assessment of teather	control group	test group
1	B	A
2	B	A
3	B	B
4	A	B
5	C	B
6	C	B
7	A	A
8	C	A
9	C	A
10	C	A
11	B	A
12	B	A
