# Supplementary material for: Digital technology for orthognathic surgery training promotion: a randomized comparative study
Source: PeerJ. 2022 Aug 2;10:e13810. doi: 10.7717/peerj.13810 (PMC9354792; doi:10.7717/peerj.13810)
Supplement: Supplemental Information 2 [file peerj-10-13810-s002.xlsx]

## Sheet: Sheet1
Control group	1	2	3	4	5	6	7	8	9	10		Experimental group	1	2	3	4	5	6	7	8	9	10
1	4	3	3	4	4	2	3	4	3	5		1	4	4	4	5	4	4	5	4	4	4
2	2	2	2	4	2	2	5	5	2	4		2	4	5	4	4	5	5	5	5	4	5
3	3	3	3	4	4	2	4	4	4	4		3	5	5	5	5	5	3	5	4	5	5
4	3	2	2	5	3	2	3	3	2	3		4	4	4	5	5	4	4	5	4	5	4
5	4	4	2	4	2	2	2	5	3	5		5	4	5	4	4	5	4	4	5	5	4
6	2	2	2	3	3	2	3	4	2	5		6	4	4	3	4	4	4	4	5	4	4
7	3	3	3	4	4	3	4	4	3	4		7	5	4	4	5	5	3	5	5	5	5
8	3	3	2	4	3	2	3	4	3	3		8	5	5	5	5	5	5	5	4	5	5
9	3	3	2	5	3	2	3	3	3	4		9	5	5	4	5	5	4	5	4	5	5
10	2	2	2	4	2	2	3	4	3	4		10	5	4	5	4	5	5	5	3	4	4
11	4	3	4	4	4	3	4	3	3	5		11	4	5	4	4	4	3	4	4	4	4
12	3	4	4	5	3	4	5	3	3	4		12	4	4	3	4	4	4	5	4	4	4
