# Supplementary material for: Digital technology for orthognathic surgery training promotion: a randomized comparative study
Source: PeerJ. 2022 Aug 2;10:e13810. doi: 10.7717/peerj.13810 (PMC9354792; doi:10.7717/peerj.13810)
Supplement: Supplemental Information 4 [file peerj-10-13810-s004.xlsx]

## Sheet: Sheet1
anatomy theory scores	control group	test group											operation scores	control group	test group							complication scores	control group	test group
	78	83												76	82								78	83
	75	77												79	81								85	67
	69	81												65	75								69	81
	82	83												68	76								82	83
	77	84												61	69								77	80
	63	78												72	87								82	79
	84	85												73	89								84	85
	76	75												66	92								73	75
	73	78												65	86								73	74
	71	93												71	93								71	72
	67	80												69	85								82	80
	72	91												83	86								85	74
	73.72±6.05	82.33±5.45												70.67±6.37	83.42±7.18								78.42±5.73	77.75±5.34
														normal distribution.homogeneity of variance.no outliers									normal distribution.homogeneity of variance.no outliers
			normal distribution.homogeneity of variance.no outliers																				The results of t test indicated that t = 0.295, P = 0.771>0.05, indicating that there was no statistical difference between the control and the experimental group in the theoretical score of complications.
total scores	control group	test group
	78	78
	75	85
	69	69
	82	82
	77	77
	63	82
	84	84
	76	73
	73	73
	71	71
	67	82
	72	85
	78	78
	75	85
	69	69
	82	82
	77	77
	63	82
	84	84
	76	73
	73	73
	71	71
	67	82
	72	85
	78	83
	85	67
	69	81
	82	83
	77	80
	82	79
	84	85
	73	75
	73	74
	71	72
	82	80
	85	74
	75.42±6.16	78.19±5.45
	normal distribution.homogeneity of variance.no outliers
